# Supplementary material
Source: PubMed Central journal article supplement (PMC3191365)
Supplement: NIHMS315438-supplement-01.pdf [file NIHMS315438-supplement-01.pdf]

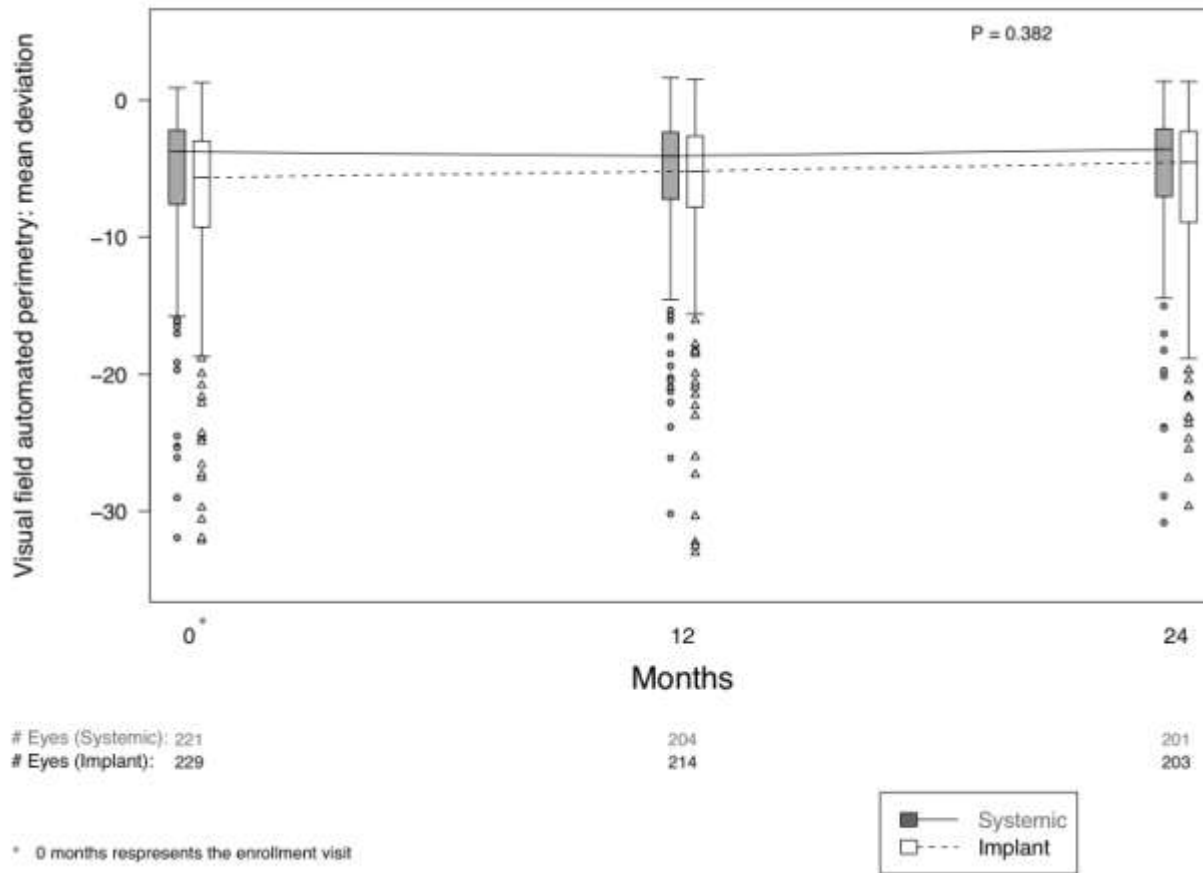

**Figure 3:** Change in visual field sensitivity (Humphrey mean deviation) over time in eyes with intermediate, posterior, and panuveitis assigned to implant or systemic therapy.
