# Supplementary material
Source: PubMed Central journal article supplement (PMC3191365)
Supplement: NIHMS315438-supplement-03.pdf [file NIHMS315438-supplement-03.pdf]

## **Appendix 1: Credit Roster of the Multicenter Uveitis Steroid Treatment (MUST) Trial Research Group**

**Key Personnel (MUST-certified)  
2005 – 2011 (29 April 2011)**

---

### **Participating Clinical Centers**

**Duke Eye Center, Durham, NC:** Glenn J. Jaffe, MD (Director); Brenda Branchaud, COT; Shelley Day, MD; Annie Lee, MD; Cindy Skalak, RN, COT; Megan Wood, MS, COA.  
*Former Members:* Claxton Baer, MD; Joyce Bryant, COT; Sai Chavala, MD; Michael Cusick, MD; Pouya Dayani, MD; Justis Ehlers, MD; Muge Kesen, MD; Alex Melamud, MD; Jawad A. Qureshi, MD; Adrienne Williams Scott; Robert F. See, MD; Robert K. Shuler, MD.

**Emory University, Atlanta, GA:** Steven Yeh, MD (Director); Alcides Fernandes, MD; Deborah Gibbs, COMT, CCRC; Donna Leef, COMT. *Former Members:* Daniel F. Martin, MD; Sunil Srivastava, MD.

**Johns Hopkins University, Baltimore, MD:** James P. Dunn, MD (Director); Ellen Arnold, BS; Patricia M. Barnabie, BS; Jeff Boring, COA; Diane M. Brown, MSN, RN; Theresa Gan, MD; Alison G. Livingston, BSN, RN; Kisten D. Nolan, MPH, RN; Terry Reed, COA.  
*Former Members:* Marie-Lynn Belair, MD; Stephen G. Bolton, CRNP; Joseph B. Brodine; Lisa M. Brune, BSN, RN; Anat Galor, MD; Adam Jacobowitz, MD; Meera Kapoor; Sanjay Kedhar, MD; Stephen Kim, MD; Henry A. Leder, MD; Yavette Morton; Kisten Nolan, BSN, MPH, RN; George B. Peters, MD, MBA; Priscilla Soto; Ricardo Stevenson, MD; Michelle Tarver-Carr, MD, PhD; Yue Wang, MD.

**Massachusetts Eye Research and Surgery Institute, Cambridge, MA:** C. Stephen Foster, MD (Director); Linda Bruner; David M. Hinkle, MD; Jyothir Johnson; Danielle Marvell; Sana S. Siddique. *Former Members:* Sarah Acevedo, MD; Fahd Anzaar, MD; Tom Cesca; Angelica Contero; Kayleigh Fitzpatrick; Karina Q. Lebron, MD; Chandra Morgan; Nita Patel, MSW; Jennifer Pinto; Janet Sprague; Taygan Yilmaz.

**National Eye Institute, Bethesda, MD:** H. Nida Sen, MD, MHSc (Director); Michael Bono; Denise Cunningham, CRA; Darryl Hayes, COA; Dessie Koutsandreas, BS, COA; Nupura Krishnadev, MD; Theresa Larson, MD; Annal D. Meleth, MD; Robert B. Nussenblatt, MD; Patti R. Sherry, BSN; Gregory L. Short, COMT; Wendy Smith, MD; Alana Temple, BSN.  
*Former Members:* Allison Bamji, RN; Hanna Coleman, MD; Geetanjali Davuluri, MD; Lisa Faia, MD; Chloe Gottlieb, MD; Guy V. Jirawuthiworavong, MD; Julie C. Lew, MD; Richard Mercer, COT; Dominic Obiyor, BSN; Cheryl H. Perry, BSN; Natalia Potapova, MD; Eric Weichel, MD; Keith J. Wroblewski, MD; Steven Yeh, MD.

**New York Eye & Ear Infirmary, New York, NY:** Paul A. Latkany, MD (Director); Jason Badamo; Jenny Gallardo; Monica Lorenzo-Latkany, MD; Robert Masini; Susan Morell; Ann

Nour; Meredith Sanchez; *Former Members:* Kenneth M. Boyd; Jacek Jarczynski; Mirjana McGrosky; Kate Steinberg.

**Royal Victorian Eye & Ear Hospital, East Melbourne, Australia:** Richard J. Stawell, MD (Director); Lisa Breayley; Carly D'Sylva; Elizabeth Glatz; Lauren Hodgson; Ignatios Koukouras; Lyndell Lim, MD; Cecilia Ling, MD; Rachel McIntosh; Julie Morrison (Ewing); Andrew Newton; Richard Smallwood; Ehud Zamir, MD. *Former Members:* Nicola Hunt; Lisa Jones; Suzanne Williams.

**Rush University Medical Center, Chicago, IL:** Pauline T. Merrill, MD (Director); Pam Hulvey; Elaine Kernbauer; Denise L. Voskuil-Marre, BS. *Former Members:* Bruce Gaynes; Christina Giannoulis; Heena S. Khan, BA; Sarah J. Levine; Scott Toennesen.

**Texas Retina Associates, Dallas, TX:** Robert C. Wang, MD (Director); Hank Aguado; Sally Arceneaux; Gary E. Fish, MD; Nick Hesse; Diana Jaramillo; Michael Mackens; Karin Mutz; Brenda Sanchez. *Former Members:* Jean Arnwine; David Callanan, MD; Kimberly Cummings; Keith Gray; Susie Howden.

**United Kingdom Institute of Ophthalmology, London, UK:** Susan Lightman, MD, PhD (Director); Simon Taylor; Rebecca Tronnberg. *Former Members:* Kate Edwards; Lavanish Joshi; Timothy Stubbs; Hamish Towler.

**University of California at Los Angeles, Los Angeles, CA:** Gary N. Holland, MD (Director); Robert D. Almanzor, COA; Jose Castellanos, COT; Jean Pierre Hubschman, MD; Ann K. Johiro, NP; Partho S. Kalyani, MD; Ralph D. Levinson, MD; Susan S. Ransome, MD. *Former Members:* Christine R. Gonzales, MD; Anurag Gupta, MD; Michael A. Kapamajian, MD; Peter J. Kappel, MD.

**University of California at San Diego, San Diego, CA:** William R. Freeman, MD (Director); Igor Kozak, MD; Vivian Nguyen; Debbie Powell, BBA. *Former Members:* Tom Clark, BSc, CRA; Denine E. Cochran, COT, CCRC, Joshua Hedaya, MD; Tiara Kemper; Jacqueline M. LeMoine; Megan E. Loughran, BA; Luzandra Magana; Francesca Mojana, MD; Victoria Morrison, MD; Stephen F. Oster, MD.

**University of California at San Francisco, San Francisco, CA:** Ira G. Wong, MD (Director); Nisha Acharya, MD; Debra Brown; David Clay; Claire M. Khouri, BA; Salena Lee, BA, OD; Mary Lew, BA; Todd P. Margolis, MD, Jay Stewart, MD.

**University of Illinois at Chicago, Chicago, IL:** Debra A. Goldstein, MD (Director); Anna L. Castro-Malek. *Former Members:* Catherine E. Crooke; Melody Huntley; Marcia Niec; Dimitry Pyatetsky, MD; Misel Ramirez; Howard H. Tessler, MD.

**University of Miami, Miami, FL:** Janet L. Davis, MD (Director); Thomas A. Albin, MD; Ariana Elizondo, BS, CCRP; David A. Pinto. *Former Members:* Daniela Castaño; Marie Chin; Macy Ho; Jaclyn L. Kovach, MD; Richard C-S Lin, MD; Efrem Mandelcorn; Jackie K-

D Nguyen, MD; Aura Pacini; Susan Pineda; Jose Rebimbas; Kimberly E. Stepien, MD; Claudia Teran.

**University of Michigan, Ann Arbor, MI:** Susan G. Elner, MD (Director); Rebecca Brown, COA; Linda Fournier, COA; Julie R. Gothrup, COA; Richard Hackel; Moella Hesselgrave, COA; Robert Prusak; Stephen J. Saxe, MD. *Former Members:* Melissa Bergeron, COA; Reneé Blosser, COMT; Carrie Chrisman-McClure; Deanna Sizemore, COA.

**University of Pennsylvania, Philadelphia, PA:** John H. Kempen, MD, PhD (Director); James Berger; Sheri Drossner; Joan C. DuPont; Albert M. Maguire, MD; Janice Petner; Laurel Weeney. *Former Members:* Tim Hopkins, MD; Dawn McCall; Monique McRay; Daniel Will, MD; Wei Xu.

**University of South Florida, Tampa, FL:** Peter R. Pavan, MD (Director); JoAnn Leto; Lori Mayor; Kim McDonald; Scott E. Pautler, MD; Wyatt Saxon; Judy Soto. *Former Members:* Burton Goldstein, MD; Amy Klukoff; Lucy Lombright; Maria Ortiz; Susan Scymanky; Dee Dee Szalay.

**University of Southern California, Los Angeles, CA:** Amani Fawzi, MD; (Director); Tamara Davis; Jackie Douglass; Judith Linton; Margaret Padilla, CCRP; Sylvia Ramos; Narsing A. Rao, MD. *Former Members:* Alexia Aguirre; Lawrence Chong, MD; Lupe Cisneros, COA; Elizabeth Corona; Dean Elliott, MD; Jesse Garcia; Rahul Khurana, MD; Jennifer Lim, MD; Rachel Mead; Julie H. Tsai, MD.

**University of Utah, Salt Lake City, UT:** Albert Vitale, MD (Director); Paul S. Bernstein, MD, PhD; Bonnie Carlstrom, COA; James Gilman, CRA; Sandra Hanseen, COA; Paula Morris, CRA; Diana Ramirez; Kimberley Wegner, BS, CRC.

**Virginia Eye Consultants, Norfolk, VA:** John D. Sheppard, MD, MMSc (Director); Brianne Anthony; Amber Casper; Lisa Felix-Kent, COA; Jeanette Fernandez, COMT; Stephen V. Scoper, MD. *Former Members:* R. Denise Cole; Nancy Crawford; Lisa Franklin; Krista Hamelin; Jen Martin; Rebecca Marx; Gregory Schultz, DD; Joseph Webb, BS; Pamela Yeager.

**Vitreoretinal Consultants, Houston, TX:** Rosa Y. Kim, MD (Director); Matthew S. Benz, MD; David M. Brown, MD; Eric Chen, MD; Richard H. Fish, MD; Shayla Friday (Hay); James Major, Jr., MD, PhD; Laura Shawver; Tien P. Wong, MD. *Former Members:* Rebecca De La Garza; Karin Mutz.

**Washington University, St. Louis, MO:** P. Kumar Rao, MD (Director); Rhonda Weeks. *Former Members:* Rajendra S. Apte, MD; Kevin J. Blinder, MD; Ashley Hartz; Pam Light; Gaurav K. Shah, MD; Russell VanGelder, MD, PhD.

## Committees

**Executive Committee:** Douglas A. Jabs, MD, MBA (Chair); Michael M. Altaweel, MD; Janet T. Holbrook, PhD, MPH; John H. Kempen, MD, PhD; Natalie Kurinij, PhD.

**Steering Committee:** Douglas A. Jabs, MD, MBA (Chair); Robert D. Almanzor, COA; Michael M. Altaweel; Diane Brown; James P. Dunn, MD; James Gilman; Janet T. Holbrook, PhD, MPH; Gary N. Holland, MD; John H. Kempen, MD, PhD; Rosa Y. Kim, MD; Natalie Kurinij, PhD; Nancy Prusakowski, MS; Jennifer E. Thorne, MD, PhD. *Former Members:* Stephen G. Bolton, RN, BSN; Lisa M. Brune, RN, BSN; Tom Clark, CRA; Larry Hubbard, MAT; Daniel F. Martin, MD; Robert B. Nussenblatt, MD.

**Data, Safety and Monitoring Committee:** *Voting members:* Janet Wittes, PhD (Chair); William E. Barlow, PhD; Marc Hochberg, MD; Alice T. Lyon, MD; Alan G. Palestine, MD; Lee S. Simon, MD. *Non-voting members:* Michael M. Altaweel, MD; Janet T. Holbrook, PhD, MPH; Douglas A. Jabs, MD, MBA; Natalie Kurinij, PhD. *Former Members:* James T. Rosenbaum, MD; Harmon Smith, PhD.

**Surgical Quality Assurance Committee:** John H. Kempen, MD, PhD (Chair); James P. Dunn, MD; Glenn J. Jaffe, MD. *Former Members:* Daniel F. Martin, MD.

**Medical Therapy Quality Assurance Committee:** Jennifer E. Thorne, MD, PhD (Chair); Nisha R. Acharya, MD, MS; Douglas A. Jabs, MD, MBA; John H. Kempen, MD, PhD; Paul A. Latkany, MD; Robert B. Nussenblatt, MD, MPH; Albert T. Vitale, MD. *Former Members:* Russell VanGelder, MD, PhD.

**Visual Function Quality Assurance Committee:** Robert D. Almanzor, COA (Chair); Judith Alexander, BA, CCRP; Jeffrey A. Boring, COA; Deborah Gibbs, COMT, CCRC; Salena Lee, OD, FAAO; Jennifer E. Thorne, MD, PhD (Advisor). *Former Members:* Wai Ping Ng, BS.

**Glaucoma Committee:** David S. Friedman, MD (Chair); Anna Adler, MS; Judith Alexander, BA, CCRP; Alyce Burke, MPH; Janet T. Holbrook, PhD, MPH; Joanne Katz, ScD; John H. Kempen, MD, PhD; Nancy Prusakowski, MS; Susan Reed, BS; Jennifer E. Thorne, MD, PhD; Husam Ansari, MD, PhD (consultant). *Former Members:* Nicholas Cohen, MS; Sanjukta Modak, MS; Wai Ping Ng, BS.

**Statistical Analysis Committee:** Elizabeth A. Sugar, PhD (Chair); Lea T. Drye, PhD; Kevin Frick, PhD; Janet T. Holbrook, PhD, MPH; JoAnn Katz, ScD; Thomas A. Louis, PhD; Mark L. Van Natta, MHS. *Former Members:* Sanjukta Modak, MS; David Shade, JD.

### Resource Centers

**Chairman's Office: Mount Sinai School of Medicine, New York, NY:** Douglas A. Jabs, MD, MBA (Study Chairman); Yasmin Hilal, MHS; Melissa A. Nieves, BA; Karen Pascual, MBA; Jill S. Slutsky-Sanon, MPA. *Former Members:* Colby Glomp; Maria Stevens, CM.

**University of Pennsylvania, Philadelphia, PA:** John H. Kempen, MD, PhD (Study Vice-Chairman).

**Coordinating Center, Johns Hopkins University Bloomberg School of Public Health, Baltimore, MD:** Janet T. Holbrook, PhD, MPH (Director); Anna L. Adler, MS; Judith Alexander, BA; Jeff A. Boring, COA; Alyce E. Burke, MPH; Karen Collins; John D. Dodge; Lea T. Drye, PhD; Cathleen S. Ewing; Kevin D. Frick, PhD; David S. Friedman, MD, PhD; Rosetta Jackson; Joanne Katz, ScD; Andrea T. Lears, BS; Hope Livingston; Thomas A. Louis, PhD; Curtis L. Meinert, PhD; Jill L. Meinert; Vinnette Morrison, BS; Deborah J. Nowakowski; Nancy Prusakowski, MS; Dave M. Shade, JD; Rochelle E. Smith, BS; Karen Steuernagle; Elizabeth A. Sugar, PhD; Jennifer E. Thorne, MD, PhD; James A. Tonascia, PhD; Mark L. Van Natta, MHS; Richard Zheng, MS. *Former Members:* Paul Chen; Nicholas Cohen, MS; Sanjukta Modak, MS; Wai Ping Ng, BS; Weijiang Shen, MS; Charles Shiflett, BS; Ada Tieman, MBA.

**University of Wisconsin Fundus Photograph Reading Center, Madison, WI:** Michael M. Altaweel, MD (Co-Director); Wendy K. Benz, PhD; Geoffrey Chambers, MS; Debra J. Christianson, BS; Amitha Domalpally, MD; Jacquelyn Freund, MS; Vonnie Gama; Sapna Gangaputra, MD, MPH; Kathleen E. Glander, BBA; Anne Goulding, BA; Jeffrey M. Joyce, MS; Christina N. Kruse, BA; Dawn J. Myers, BS; Susan Reed, BS; James L. Reimers, BA; Amy Remm, BS; Ruth A. Susman, BS; Dennis Thayer; Erika Treichel, DVM; Kelly J. Warren, RN, BS, MSES; Sheila M. Watson, BS, DVM; James K. White, BME; Tara Wilhelmson, BS. *Former Members:* Margaret A. Fleischli, AB, DVM; Dennis Hafford; Susan E. Harris, MS; Larry D. Hubbard, MAT; Kristine A. Johnson; Lauren Nagle; Gwyn E. Padden-Lechten, BS; Alyson Pohlman, BA; Peggy Sivesind; Mary K. Webster, BS; Grace Zhang, BA.

**National Eye Institute, Bethesda, MD:** Natalie Kurinij, PhD.
